# Supplementary material
Source: PubMed Central journal article supplement (PMC6375087)

Figure S1

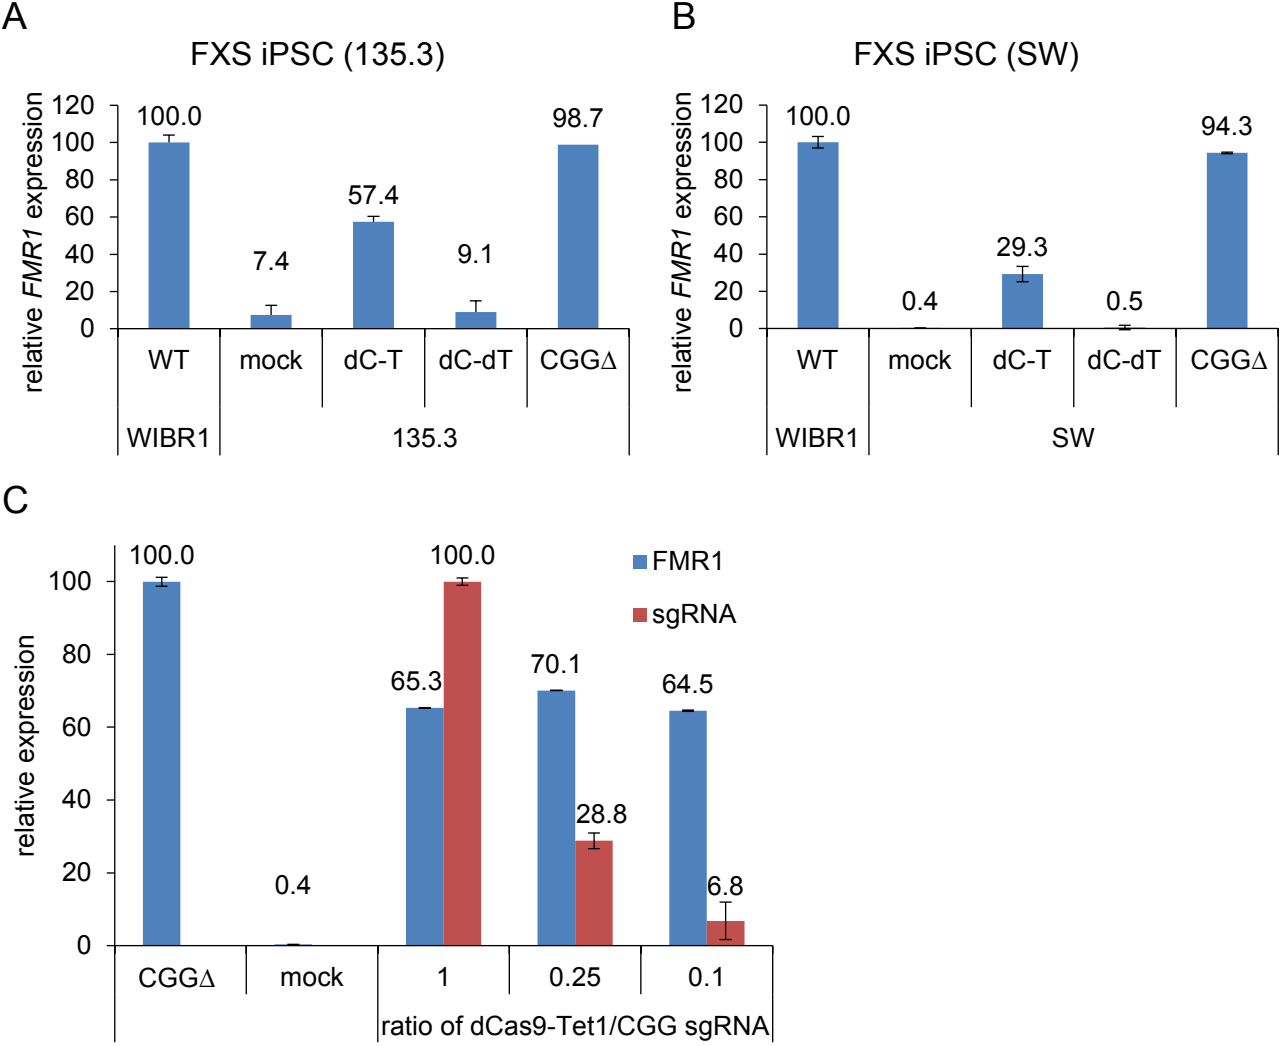

Supplement: NIHMS941632-supplement-1.pdf [file NIHMS941632-supplement-1.pdf]
